# Supplementary material for: Clinical Features of COVID-19 Vaccine-Associated Autoimmune Hepatitis: A Systematic Review
Source: MDPI journal article supplement (doi:10.3390/diseases11020080), 2023-05-30
Supplement: s1 [file s1]

| First author    | Countr y/Years    | Gender /Age | Personal history                                         | routine medication                                                   | Type of COVID-19 vaccine | Timing of Symptom Onset                           | Symptoms                                      | Hepatotropic viruses             | Peak laboratory values                                                                        | Autoantibodies Positive | Liver biopsy                                                                                                                                                            | Treatment                            | Outcome  |
|-----------------|-------------------|-------------|----------------------------------------------------------|----------------------------------------------------------------------|--------------------------|---------------------------------------------------|-----------------------------------------------|----------------------------------|-----------------------------------------------------------------------------------------------|-------------------------|-------------------------------------------------------------------------------------------------------------------------------------------------------------------------|--------------------------------------|----------|
| Garrido [1]     | Portugal /2021    | F/65        | Polycythemia vera                                        | Acetylsalicylic acid; Sertraline; Esomeprazole; Pegylated interferon | Moderna                  | Day 14 after 1st does                             | Jaundice; Choluria; Abdominal pain;           | HIV;HAV;HBV;HCV; HEV;CMV;EBV;HSV | ALT:1092 U/L<br>AST:1056 U/L<br>ALP:24 U/L<br>TBL:1.14 mg/dl<br>GGT:329 U/L<br>IgG:2000 mg/dl | ANA                     | Intense plasma cells infiltrate in the portal; Severe interface hepatitis; Multiple confluent foci of lobular necrosis;                                                 | Prednisolone                         | Improved |
| Avci[2]         | Turkey/ 2021      | F/61        | Hashimoto’s thyroiditis; Hypertension; Infected COVID-19 | Valsartan; Levothyroxine                                             | Pfizer                   | Day 14 after 1st does                             | Jaundice; Malaise; Fatigue; Anorexia; Nausea; | HAV;HBV;HCV; CMV;EBV             | ALT:455<br>AST:913<br>TBL:11.8<br>GGT:292<br>IgG:4260                                         | ANA<br>ASMA             | Intense lymphocyte infiltrate in the portal and periportal; Periseptal interface hepatitis; Spotty necrosis; Fibrosis                                                   | Prednisolone; Azathioprine;          | Improved |
| Bril [3]        | USA/20 21         | F/25        | Postpartum; gestational hypertension                     | Labetalol                                                            | Pfizer                   | Day 7 after 1st does                              | Pruritus; Choluria; Jaundice                  | HIV;HAV;HBV;HCV; CMV;EBV;HSV     | ALT:2001<br>AST:754<br>ALP:170<br>TBL:4.8<br>IgG:1081                                         | ANA; ds-DNA.            | Intense lymphoplasmacytic, eosinophils and plasma cells infiltrate in the portal; Scattered necrotic hepatocytes                                                        | Prednisone                           | Improved |
| Ghielmetti. [4] | Switzerl and/2021 | M/63        | Type 2 diabetes; ischemic heart disease                  | Metformin; Acetylsalicylic acid; Rosuvastatin                        | Moderna                  | Day 7 after 1st does                              | Jaundice; Fatigue; Anorexia;                  | anti-HAV IgM; HBV;HCV;HEV;       | ALT:1038<br>AST:1127<br>ALP:192<br>TBL:2.32<br>GGT:536<br>IgG:19.96                           | ANA; ASMA               | Intense lymphoplasmacytic and plasma cellular infiltrate with scattered eosinophils; Interface hepatitis; Centrilobular necrosis;                                       | Prednisone                           | Improved |
| Rocco[5]        | Italy/20 21       | F/80        | Hashimoto's thyroiditis; acute glomerulonephritis        | Levothyroxine; Corticosteroids; Pravastatin; Aspirin                 | Pfizer                   | Day 7 after 1st does                              | Choluria; Jaundice                            | HIV;HAV;HBV;HCV; ;CMV;EBV;HSV    | ALT:1186<br>AST:1401<br>ALP:243<br>TBL:10.5<br>GGT:524<br>IgG:3500                            | ANA;                    | Lymphoplasmacytic infiltrate; Multiple confluent foci of lobular necrosis and councilman bodies;                                                                        | Prednisone                           | Improved |
| Tan[6]          | Singapo re/2021   | F/56        | NA                                                       | Rosuvastatin                                                         | Pfizer                   | Day 1 after 1st does                              | Malaise; Fever; Fatigue; Anorexia<br>Jaundice | HAV;HBV;HCV; HEV;CMV;EBV;HSV     | ALT:1701<br>AST:1124<br>ALP:298<br>TBL:1.15<br>IgG:3260                                       | ANA; ASMA;              | Intense plasma cells, lymphocytes and few eosinophils aggregation in portal tract; interface hepatitis; fibrosis;                                                       | Budesonide                           | Improved |
| Glayton [7]     | Australi a/2021   | M/36        | Hypertension; Laser eye surgery;                         | Olmesartan; Acetaminophen; Ibuprofen;                                | AstraZeneca              | Day 26 after 1st does                             | Pruritus                                      | HIV;HAV;HBV;HCV; HEV;CMV;EBV;HSV | ALT:2550<br>AST:633<br>ALP:118<br>TBL:45<br>GGT:136<br>IgG:1280                               | ANA;                    | Intense predominantly lymphocytic in the portal tract; severe interface hepatitis; fibrosis;                                                                            | Prednisolone                         | Improved |
| Zin[8]          | UK/2021           | M/47        | NA                                                       | NA                                                                   | Moderna                  | Day 3 after 1st does; within day 7 after 2nd does | Malaise; Jaundice; Abdominal pain;            | HAV;HBV;HCV; HEV ;CMV;EBV;       | ALT:1048<br>ALP:229<br>TBL:41<br>IgG:2510                                                     | ANA;                    | Lymphoplasmatic inflammation including eosinophils, ballooned hepatocytes, multinucleated giant cells, and emperipolesis; marked interface hepatitis; minimal fibrosis; | Prednisolone                         | Improved |
| Lodato [9]      | Italy/20 21       | F/43        | Hyperlipidemia;                                          | Ginkgo-biloba                                                        | Pfizer                   | Day 15 after 1st does; day 2 after 2nd does       | Malaise; Jaundice; Abdominal pain;            | HIV;HAV;HBV;HCV; HEV;CMV;EBV;    | ALT:171<br>AST:132<br>TBL:29.15 mg/dl                                                         | Negative                | Moderate lymphocytes infiltrate in the portal; interface hepatitis; spotty necrosis; focal moderate steatosis; no fribrosis                                             | N-acetylcysteine; Methylprednisolone | Improved |

|                 |               |      |                                                                          |                                                                       |             |                       |                                              |                                       |                                                                             |                                                         |                                                                                                                                                                                                                                                          |                                                |          |
|-----------------|---------------|------|--------------------------------------------------------------------------|-----------------------------------------------------------------------|-------------|-----------------------|----------------------------------------------|---------------------------------------|-----------------------------------------------------------------------------|---------------------------------------------------------|----------------------------------------------------------------------------------------------------------------------------------------------------------------------------------------------------------------------------------------------------------|------------------------------------------------|----------|
| Ehelfi [10]     | Germany/2021  | F/36 | Primary sclerosing cholangitis; Ulcerative colitis                       | Ursodeoxycholic acid; Endoscopic biliary intervention;                | Moderna     | Day 11 after 1st does | Jaundice; Pruritus; Fatigue;                 | HAV;HBV;HCV;HEV; CMV;EBV;             | ALT: 588<br>AST: 581<br>ALP: 1077<br>TBL: elevated<br>GGT: 757<br>IgG: 2475 | ANA; ds-DNA                                             | Intense lymphoplasmacellular, plasma cells, few eosinophils infiltrate in the portal small bile ducts; interface hepatitis;scatter rosette formation and apoptotic hepatocytes;                                                                          | Prednisone                                     | Improved |
| Mahalingham[11] | UK/2021       | F/32 | Orthotopic liver transplantation for autoimmune hepatitis; Hypertension; | Tacrolimus; Azathioprine; Prednisolone; Aspirin; Vitamin D; Atenolol; | Pfizer      | Day 26 after 2nd does | NA                                           | HAV;HBV;HCV;HDV; HEV;CMV;EBV;         | NA                                                                          | Soluble liver antigen; Liver pancreas antibody positive | Intense lymphoplasmacytic, plasma cells, rare eosinophils infiltrate in the portal; interface activity with focal rosetting and emperipolesis; No documented fibrosis;                                                                                   | Methylprednisolone; Prednisolone; Azathioprine | Improved |
| Fimiano [12]    | Italy/2021    | F/63 | postmenopausal hypothyroidism; Familial autoimmune conditions;           | NA                                                                    | Pfizer      | Day 53 after 1st does | Abdominal pain; Anorexia; Choluria; Jaundice | HIV;HAV;HBV;HCV; HEV;CMV;EBV;HSV;HHV; | ALT:1778<br>AST:1625<br>ALP:273<br>TBL:18.6<br>GGT:419<br>IgG:1760          | ANA;                                                    | Intense plasma cells infiltrate in the portal/periportal and lobular; interface activity, focal confluent necrosis, scattered apoptotic bodies;                                                                                                          | methylprednisolone; Azathioprine               | Improved |
| Erard [13]      | France/2021   | F/80 | NA                                                                       | NA                                                                    | Pfizer      | Day 10 after 1st does | Fatigue; Pruritus; Jaundice;                 | HIV;HAV;HBV;HCV;HEV; CMV;EBV;HSV      | ALT:541<br>AST:583<br>TBL:0.88<br>IgG:2090                                  | ANA;                                                    | Intense lymphoplasmacytic infiltrate in the lobular and portal; interface hepatitis; hepatocyte necrosis;                                                                                                                                                | Steroids                                       | Improved |
|                 |               | F/73 | NA                                                                       | NA                                                                    | Moderna     | Day 21 after 1st does | Fatigue; Pruritus; Jaundice;                 | HIV;HAV;HBV;HCV;HEV; CMV;EBV;HSV      | ALT:1027<br>AST:1163<br>TBL:3.78<br>IgG:1800                                | ANA;                                                    | Intense lymphoplasmacytic infiltrate in the lobular and portal; interface hepatitis; hepatocyte necrosis;                                                                                                                                                | Steroids                                       | Improved |
|                 |               | F/68 | NA                                                                       | NA                                                                    | AstraZeneca | Day 20 after 1st does | Fatigue; Pruritus; Jaundice;                 | HIV;HAV;HBV;HCV;HEV; CMV;EBV;HSV      | ALT:2029<br>AST:2314<br>TBL:8.5<br>IgG:1850                                 | ANA;                                                    | Intense lymphoplasmacytic infiltrate in the lobular and portal; interface hepatitis; hepatocyte necrosis;                                                                                                                                                | Steroids                                       | Died     |
| Kang [14]       | Korea/2021    | F/27 | None                                                                     | None                                                                  | BioNTech    | Day 7 after 2nd does  | Jaundice;                                    | HIV;HAV;HBV;HCV;HEV; CMV;EBV;HSV      | ALT:1478<br>AST:1004<br>ALP:182<br>TBL:8.6<br>IgG:1641                      | ANA;                                                    | Intense lymphocytes, clusters of plasma cells and few eosinophils infiltrate in the portal tract and lobules; mild cholestasis with hepatocytic rosettes; interface hepatitis; mild cholestasis with hepatocytic rosettes; moderate periportal fibrosis; | Prednisolone                                   | Improved |
| Shahrani[15]    | Malaysia/2022 | F/59 | Dyslipidemia                                                             | NA                                                                    | AstraZeneca | Day 12 after 2nd does | Jaundice                                     | HAV;HBV;HCV;HEV                       | ALT:1178<br>AST:962<br>IgG:1740                                             | NA                                                      | Lympho-plasma-cells infiltrate in the portal;                                                                                                                                                                                                            | Prednisolone                                   | Improved |
|                 |               | F/63 | Ulcerative colitis; Primary sclerosing cholangitis ;                     | NA                                                                    | AstraZeneca | Day 14 after 1st does | Jaundice                                     | HAV;HBV;HCV;HEV                       | ALT:354<br>AST:505<br>IgG:2030                                              | NA                                                      | Presence of interface and lobular hepatitis; Bridging fibrosis;                                                                                                                                                                                          | Prednisolone                                   | Died     |

|                       |                |      |                                                                           |                                              |             |                       |                                                    |                                   |                                                                  |                                        |                                                                                                                                                                                                                                        |                                            |          |
|-----------------------|----------------|------|---------------------------------------------------------------------------|----------------------------------------------|-------------|-----------------------|----------------------------------------------------|-----------------------------------|------------------------------------------------------------------|----------------------------------------|----------------------------------------------------------------------------------------------------------------------------------------------------------------------------------------------------------------------------------------|--------------------------------------------|----------|
|                       |                | F/72 | NA                                                                        | NA                                           | Pfizer      | Day 10 after 1st does | Jaundice                                           | HAV;HBV;HCV;HEV                   | ALT:2280<br>AST:254<br>IgG:1940                                  | NA                                     | Intense of lymphocytes and plasma cells in the protal;<br>hepatocyte necrosis;                                                                                                                                                         | Prednisolone                               | Improved |
| <b>Bjornsson [16]</b> | Italy/2022     | F/52 | lung adenocarcinoma;<br>HBV with normal liver function test               | Carboplatin;<br>Pemetrexed;<br>Pembrolizumab | Pfizer      | Day 10 after 1st does | Diarrhea                                           | HAV;HCV;HDV;HEV                   | ALT:229<br>AST:147<br>ALP:161<br>TBL:1.98<br>GGT:139<br>IgG:1400 | ANA<br>ASMA                            | Portal inflammation;                                                                                                                                                                                                                   | Prednisone                                 | Improved |
| <b>Goulas [17]</b>    | Greece/2022    | F/52 | None                                                                      | None                                         | Moderna     | Day 14 after 1st does | Malaise;<br>Jaundice                               | HAV;HBV;HCV;HEV;CMV;EBV;          | ALT:936<br>AST:350<br>ALP:169<br>TBL:9.06<br>GGT:810<br>IgG:2396 | ANA;<br>ASMA                           | Intense lymphocytes, plasmacytes, histiocytes, few eosinophiles and neutrophils infiltrate in the portal;<br>mild periportal hepatitis; apoptotic bodies;hepatocytes with feathery degeneration of the cytoplasm and rosette formation | Prednisolone<br>Azathioprine               | Improved |
| <b>Pinazo [18]</b>    | Spain/2022     | F/77 | None                                                                      | Bromazepam;<br>Losartan;<br>Omeprazole       | Pfizer      | Day 2 after 2nd does  | NA                                                 | Undocumented                      | ALT:552<br>AST:474<br>ALP:159<br>TBL:3.1<br>IgG:Normal           | ANA;<br>AMAs                           | Compatible with AIH                                                                                                                                                                                                                    | Prednisone;<br>Azathioprine;<br>Budesonide | Died     |
|                       |                | M/23 | None                                                                      | None                                         | Moderna     | Day 10 after 2nd does | NA                                                 | Undocumented                      | ALT:587<br>AST:702<br>ALP:202<br>TBL:2.3<br>IgG:1647             | NA                                     | Compatible with AIH                                                                                                                                                                                                                    | Prednisone                                 | Improved |
| <b>Bjornsson [19]</b> | Singapore/2022 | M/34 | Drank socially                                                            | None                                         | Moderna     | Day 16 after 2nd does | Pruritus;<br>Fever;<br>Jaundice                    | HAV;HBV;HCV;<br>HEV;CMV;EBV;      | ALT:223<br>AST:111<br>ALP:149<br>TBL:1.49<br>GGT:98<br>IgG:1460  | Negative                               | Mild portal inflammation with scattered eosinophils, cholestasis, scattered eosinophils;                                                                                                                                               | Ursodeoxycholic acid;                      | Improved |
| <b>Londono[20]</b>    | Spain/2022     | F/41 | Premature ovarian failure                                                 | Substitutive hormonal therapy                | Moderna     | Day 7 after 2nd does  | Abdominal pain;<br>Nausea<br>Choluria;<br>Jaundice | "HIV;HAV;HBV;HCV;HEV;CMV;EBV;HSV" | ALT:1312<br>AST:993<br>ALP:190<br>TBL:2.3<br>GGT:209<br>IgG:2080 | ANA;<br>ASMA;<br>anti-SLA;<br>anti-LC1 | Intense lymphocytes and plasma cells infiltrate in the portal tracts; severe interface hepatitis; apoptotic bodies; perisinusoidal fibrosis;                                                                                           | Prednisone                                 | Improved |
| <b>Mesher[21]</b>     | Ireland/2021   | F/71 | left total hip replacement;<br>osteoarthritis of the knees;<br>HAV IgG(+) | None                                         | Moderna     | Day 10 after 1st does | Jaundice                                           | "HIV;HBV;HCV;<br>HEV;CMV;EBV;HSV" | ALT:1143<br>AST:1469<br>ALP:237<br>TBL:3.76<br>IgG:2177          | ANA;<br>ASMA                           | Intense plasma cells, lymphocytes, eosinophils, neutrophils infiltrate in the portal; interface hepatitis; rosettes formed; bridging necrosis;                                                                                         | Prednisolone                               | Improved |
| <b>Rela [22]</b>      | India/2021     | F38  | Hypothyroidism                                                            | Levothyroxine                                | AstraZeneca | Day 20 after 1st does | Fever; Fatigue;<br>Jaundice                        | HAV;HBV;HCV; HEV                  | ALT:1025<br>AST:1101<br>TBL:14.9<br>IgG:1650                     | ANA                                    | Intense lymphocytes, plasma cells and rare eosinophils infiltrate in the portal; multiacinar hepatic necrosis; diffuse portal/periportal neocholangiolar proliferation;                                                                | Prednisolone                               | Improved |

|             |                          |      |                                                                       |                                          |             |                       |                                 |                                     |                                                                          |                     |                                                                                                                                          |                               |          |
|-------------|--------------------------|------|-----------------------------------------------------------------------|------------------------------------------|-------------|-----------------------|---------------------------------|-------------------------------------|--------------------------------------------------------------------------|---------------------|------------------------------------------------------------------------------------------------------------------------------------------|-------------------------------|----------|
|             |                          | M/62 | Jaundice                                                              | None                                     | AstraZeneca | Day 16 after 1st does | Fever;<br>Anorexia;<br>Jaundice | HAV; HBV; HEV; HCV;                 | ALT:1094<br>AST:1361<br>TBL:25.6                                         | Negative            | Moderate lymphocytes; plasma cells, eosinophils and polymorphs infiltrate in the portal; porto-central bridging necrosis; mild fibrosis; | Prednisolone                  | Died     |
| Palla [23]  | Greece/<br>2022          | F/40 | Sarcoidosis                                                           | None                                     | Pfizer      | NA                    | NA                              | HIV;HAV;HBV;HCV;HEV;<br>CMV;EBV;HSV | ALT:4X upper limit of normal<br>AST:4X upper limit of normal<br>IgG:2400 | ANA;                | Intense lymphocytes; plasma cells infiltrate in the portal and lobular interface hepatitis; Portal and periportal fibrosis;              | Prednisolone                  | Improved |
| Vuille [24] | Switzerl<br>and/202<br>1 | F/76 | COVID-19 infected;<br>Hashimoto thyroiditis;<br>urothelial carcinoma; | Levothyroxine,<br>Midodrine;<br>Zolpidem | Moderna     | Day 3 after 1st does  | NA                              | HAV;HBV;HCV;<br>HEV;CMV;            | ALT:579<br>AST:811<br>ALP:124<br>TBL:0.74<br>GGT:361<br>IgG:3940         | ANA<br>ASMA<br>ANCA | Intense plasma cells infiltrates in the protral; interface hepatitis; apoptotic bodies; pseudorosettes                                   | Prednisolone;<br>Azathioprine | Improved |
| Shroff [25] | USA/20<br>21             | M/46 | Nonalcoholic fatty liver disease; Drug-induced liver injury           | Amoxicillin                              | Pfizer      | Day 10 after 1st does | NA                              | Viral serologies negative           | ALT:594<br>ALP:197<br>TBL:3.9                                            | ASMA                | Mixed infiltrate in the portal;<br>Mild ductular proliferation; portal and peri-portal fibrosis;                                         | Endoscopic biliary dilation   | Improved |
|             |                          | F/61 | None                                                                  | Nitrofurantoin                           | Pfizer      | Day 34 after 1st does | NA                              | Viral serologies negative           | ALT:2331<br>ALP:160<br>TBL:3.7                                           | ASMA                | Lymphocytes and plasma cells in the portal and lobular;                                                                                  | Prednisone                    | Improved |
|             |                          | F/42 | None                                                                  | None                                     | Pfizer      | Day 42 after 1st does | NA                              | EBV(+)                              | ALT:1735<br>ALP:287<br>TBL:1.5                                           | ANA                 | Intense mixed infiltrate in the portal;Neutrophilic peri-cholangitis;                                                                    | Prednisone                    | Improved |
|             |                          | F/33 | AIH (treated)<br>Compensated cirrhosis                                | None                                     | Pfizer      | Day 28 after 1st does | NA                              | None documented                     | ALT:173<br>ALP:46<br>TBL:2.1                                             | NA                  | Intense plasma cells in the portal and lobular; interface hepatitis; cirrhosis;                                                          | Prednisone                    | Improved |
|             |                          | M/68 | Diagnosis of solitary hepatocellular carcinoma                        | None                                     | Pfizer      | Day 19 after 1st does | NA                              | Viral serologies negative           | ALT:245<br>ALP:55<br>TBL:0.9                                             | NA                  | Intense plasma cells in the portal and lobular;interface hepatitis; cirrhosis;                                                           | Prednisone                    | Improved |
|             |                          | F/66 | AIH (treated)                                                         | Received shingles vaccine                | Moderna     | Day 5 after 1st does  | NA                              | Viral serologies negative           | ALT:1199<br>ALP:352<br>TBL:5.9                                           | NA                  | Intense plasma cells in the portal and lobular;interface hepatitis; central perivenulitis;                                               | Prednisone                    | Improved |

|  |  |      |                         |             |         |                       |    |                                      |                                  |              |                                                                                                   |                               |          |
|--|--|------|-------------------------|-------------|---------|-----------------------|----|--------------------------------------|----------------------------------|--------------|---------------------------------------------------------------------------------------------------|-------------------------------|----------|
|  |  | F/68 | Urinary tract infection | Ceftriaxone | Moderna | Day 15 after 1st does | NA | Viral serologies negative            | ALT:2367<br>ALP:176<br>TBL:25    | Negative     | Intense inflammtion in the portal and lobular; interface hepatitis; severe bile; ductular rection | steroids;<br>N-acetylcysteine | Improved |
|  |  | F/59 | None                    | Tylenol     | Moderna | Day 31 after 1st does | NA | EBV(+);<br>Viral serologies negative | ALT:869<br>ALP:367<br>TBL:14.7   | ANA          | Intense Lymphocytes in the portal and lobular; Ductular reaction;                                 | Methylprednisolone            | Improved |
|  |  | M/59 | None                    | Tylenol     | Moderna | Day 46 after 1st does | NA | Viral serologies negative            | ALT:2664<br>ALP:2252<br>TBL:22.3 | ANA;<br>ASMA | Mild Lymphocytes in the portal; bile duct injury;                                                 | None                          | Improved |

Abbreviations: M, male; F, female; AIH, autoimmune hepatitis; ALT, alanine aminotransferase; AST, aspartate aminotransferase; ALP, alkaline phosphatase; TBL, total bilirubin; GGT, gamma glutamyl transferase; IgG, immunoglobulin G; ANA, anti-nuclear antibodies; ASMA, anti-smooth muscle antibodies; ds-DNA; anti-double stranded DNA; anti-SLA, antibodies against soluble liver antigen; anti-LC1, anti-liver cytosol type 1.

1. Garrido, I., et al., *Autoimmune hepatitis after COVID-19 vaccine - more than a coincidence*. J Autoimmun, 2021. **125**: p. 102741.
2. Avci, E. and F. Abasiyanik, *Autoimmune hepatitis after SARS-CoV-2 vaccine: New-onset or flare-up?* J Autoimmun, 2021. **125**: p. 102745.
3. Bril, F., et al., *Autoimmune hepatitis developing after coronavirus disease 2019 (COVID-19) vaccine: Causality or casualty?* J Hepatol, 2021. **75**(1): p. 222-224.
4. Ghielmetti, M., et al., *Acute autoimmune-like hepatitis with atypical anti-mitochondrial antibody after mRNA COVID-19 vaccination: A novel clinical entity?* J Autoimmun, 2021. **123**: p. 102706.
5. Rocco, A., et al., *Autoimmune hepatitis following SARS-CoV-2 vaccine: May not be a casualty*. J Hepatol, 2021. **75**(3): p. 728-729.
6. Tan, C.K., et al., *Autoimmune hepatitis following COVID-19 vaccination: True causality or mere association?* J Hepatol, 2021. **75**(5): p. 1250-1252.
7. Clayton-Chubb, D., et al., *Autoimmune hepatitis developing after the ChAdOx1 nCoV-19 (Oxford-AstraZeneca) vaccine*. J Hepatol, 2021. **75**(5): p. 1249-1250.
8. Zin Tun, G.S., et al., *Immune-mediated hepatitis with the Moderna vaccine, no longer a coincidence but confirmed*. J Hepatol, 2022. **76**(3): p. 747-749.
9. Lodato, F., et al., *An unusual case of acute cholestatic hepatitis after m-RNABNT162b2 (Comirnaty) SARS-CoV-2 vaccine: Coincidence, autoimmunity or drug-related liver injury*. Journal of Hepatology, 2021. **75**(5): p. 1254-1256.
10. Ghelfi, J., et al., *Successful management of refractory ascites in non-TIPSable patients using percutaneous thoracic duct stenting*. J Hepatol, 2022. **76**(1): p. 216-218.
11. Mahalingham, A., A. Duckworth, and W.J.H. Griffiths, *First report of post-transplant autoimmune hepatitis recurrence following SARS-CoV-2 mRNA vaccination*. Transpl Immunol, 2022. **72**: p. 101600.
12. Fimiano, F., et al., *Autoimmune hepatitis or drug-induced autoimmune hepatitis following Covid-19 vaccination?* Liver Int, 2022. **42**(5): p. 1204-1205.
13. Erard, D., et al., *Autoimmune hepatitis developing after COVID 19 vaccine: Presumed guilty?* Clin Res Hepatol Gastroenterol, 2022. **46**(3): p. 101841.
14. Kang, S.H., et al., *Autoimmune Hepatitis Following Vaccination for SARS-CoV-2 in Korea: Coincidence or Autoimmunity?* J Korean Med Sci, 2022. **37**(15): p. e116.
15. Shahrani, S., et al., *Autoimmune hepatitis (AIH) following coronavirus (COVID-19) vaccine-No longer exclusive to mRNA vaccine?* Liver Int, 2022. **42**(10): p. 2344-2345.
16. Lasagna, A., *Development of hepatitis triggered by SARS-CoV-2 vaccination in patient with cancer during immunotherapy: a case report*. , 2022.
17. Goulas, A., et al., *A typical autoimmune hepatitis (AIH) case following Covid-19 mRNA vaccination. More than a coincidence?* Liver Int, 2022. **42**(1): p. 254-255.
18. Pinazo-Bandera, J.M., et al., *Acute hepatitis with autoimmune features after COVID-19 vaccine: coincidence or vaccine-induced phenomenon?* Gastroenterol Rep (Oxf), 2022. **10**: p. goac014.
19. Bjornsson, H.K. and E.S. Bjornsson, *Reply to: "Can azathioprine prevent infliximab-induced liver injury?"*. J Hepatol, 2022. **77**(2): p. 555-556.
20. Londono, M.C., J. Gratacos-Gines, and J. Saez-Penataro, *Another case of autoimmune hepatitis after SARS-CoV-2 vaccination - still casualty?* J Hepatol, 2021. **75**(5): p. 1248-1249.
21. McShane, C., et al., *The mRNA COVID-19 vaccine - A rare trigger of autoimmune hepatitis?* J Hepatol, 2021. **75**(5): p. 1252-1254.
22. Rela, M., et al., *Auto-immune hepatitis following COVID vaccination*. J Autoimmun, 2021. **123**: p. 102688.
23. Palla, P., et al., *Letter to the editor: Autoimmune hepatitis after COVID-19 vaccination: A rare adverse effect?* Hepatology, 2022. **75**(2): p. 489-490.
24. Vuille-Lessard, E., et al., *Autoimmune hepatitis triggered by SARS-CoV-2 vaccination*. J Autoimmun, 2021. **123**: p. 102710.
25. Shroff, H., et al., *Liver injury following SARS-CoV-2 vaccination: A multicenter case series*. J Hepatol, 2022. **76**(1): p. 211-214.
